# Supplementary material
Source: MDPI journal article supplement (https://www.mdpi.com/2304-6740/12/2/61)
Supplement: s1 [file s1]

### Supplementary Information

Table S1. Crystallographic data for CuV16

|                                                             | CuV16                                                                                           |
|-------------------------------------------------------------|-------------------------------------------------------------------------------------------------|
| formula                                                     | C <sub>32</sub> H <sub>78</sub> Cu <sub>2</sub> N <sub>12</sub> O <sub>47</sub> V <sub>16</sub> |
| fw                                                          | 2325.18                                                                                         |
| crystal system                                              | monoclinic                                                                                      |
| space group                                                 | <i>P</i> 2 <sub>1</sub> / <i>c</i> (#14)                                                        |
| <i>a</i> (Å)                                                | 15.3809(3)                                                                                      |
| <i>b</i> (Å)                                                | 24.2793(4)                                                                                      |
| <i>c</i> (Å)                                                | 21.5471(3)                                                                                      |
| $\beta$ (deg)                                               | 102.3660(10)                                                                                    |
| <i>V</i> (Å <sup>3</sup> )                                  | 7859.8(2)                                                                                       |
| <i>Z</i>                                                    | 4                                                                                               |
| $\mu$ (mm <sup>-1</sup> )                                   | 16.603                                                                                          |
| <i>R</i> <sub>1</sub> ( <i>I</i> > 2 $\sigma$ ( <i>I</i> )) | 0.0519                                                                                          |
| <i>wR</i> <sub>2</sub>                                      | 0.1349                                                                                          |

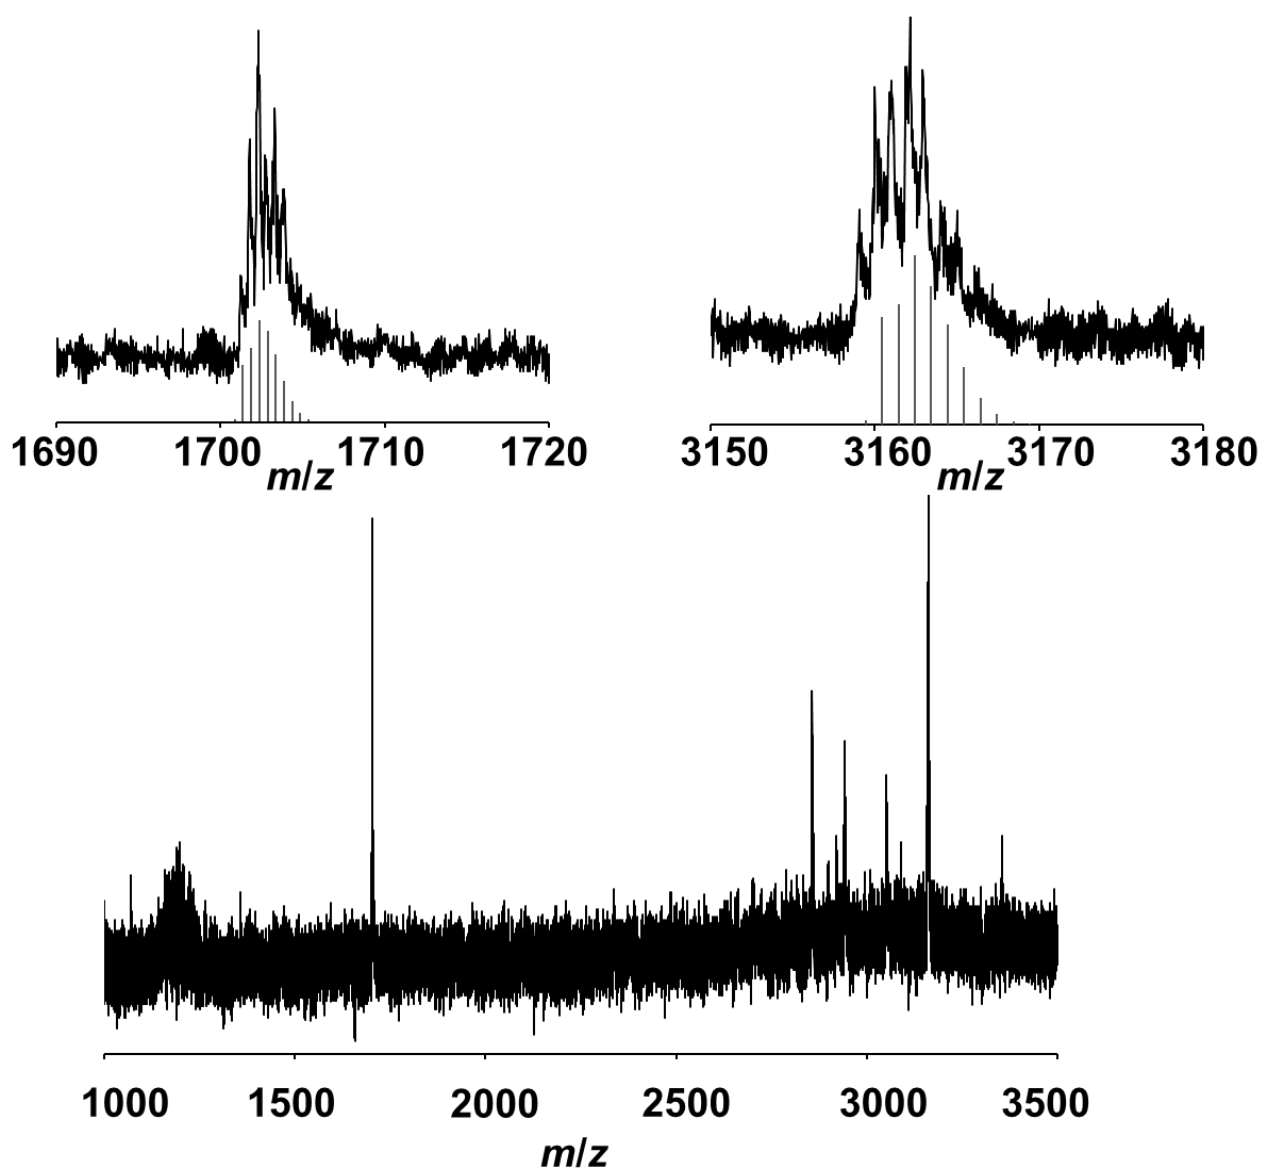

**Figure S1.** Electrospray-ionization mass spectra of Cu<sub>2</sub>V<sub>16</sub> in acetonitrile.

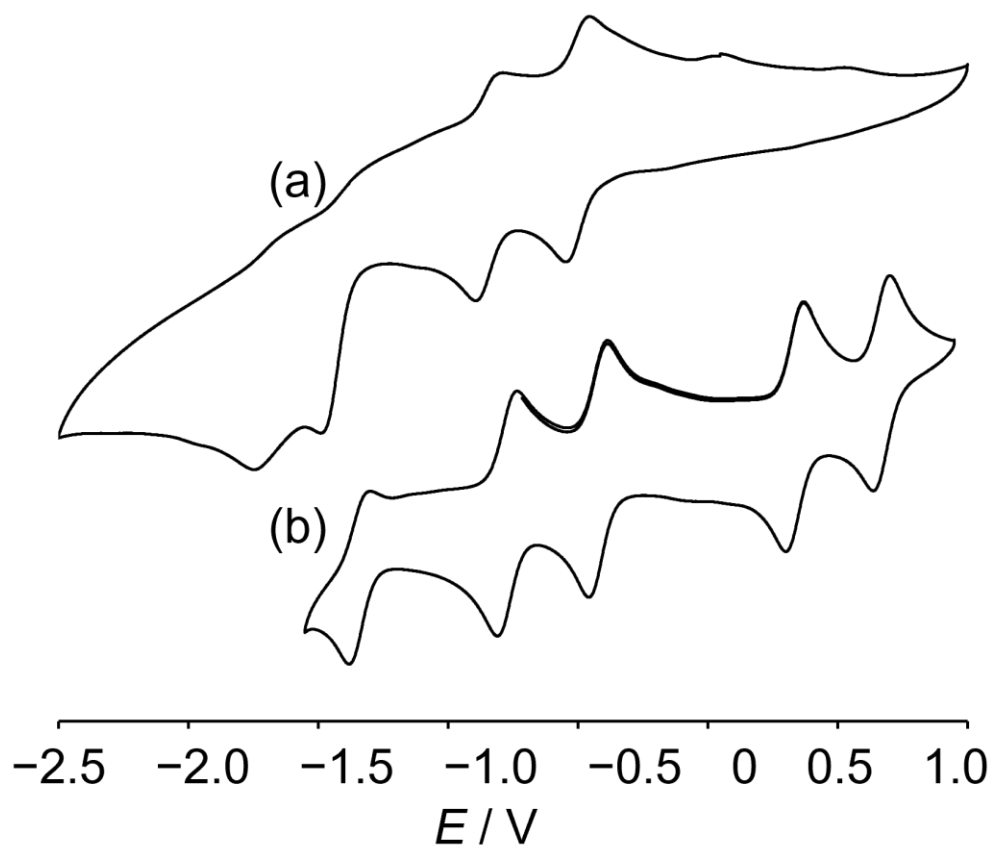

**Figure S2.** Cyclicvoltamogram of (a)  $\text{Cu}_2\text{V16}$  and (b) V18 in acetonitrile. Scan rate was  $100 \text{ mV s}^{-1}$ . The working electrode was glassy carbon and the reference electrode was the  $\text{Ag}/\text{Ag}^+$  electrode. The supporting electrolyte was  $(^n\text{Bu}_4\text{N})\text{PF}_6$ .

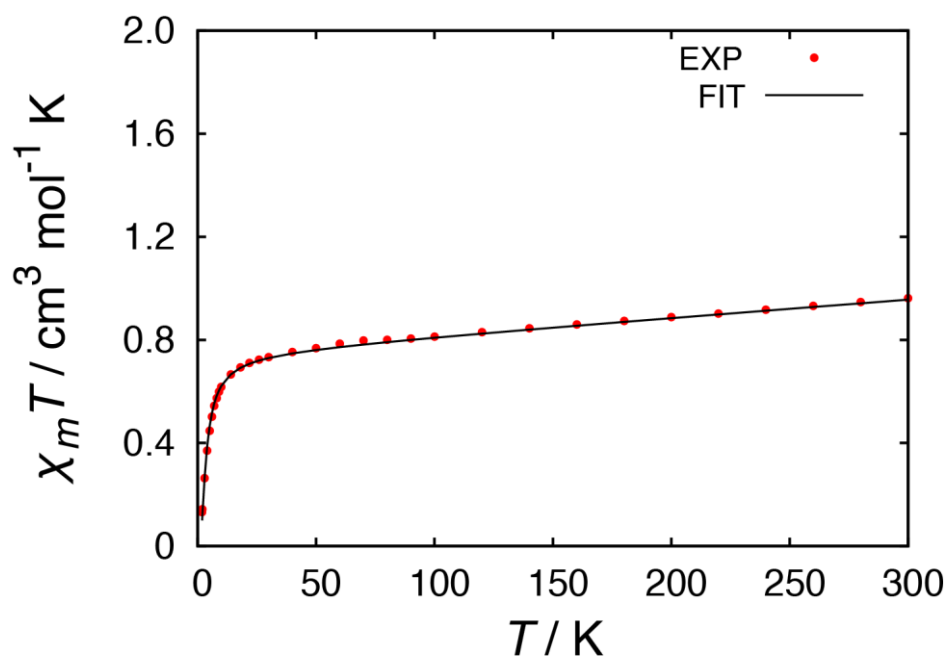

**Figure S3.**  $\chi_m T$  versus  $T$  plot of Cu<sub>2</sub>V<sub>16</sub> in applied field of 5000 Oe (red points). The solid line corresponds to the fit by PHI program assuming the isotropic exchange interaction with the Hamiltonian:  $\mathbf{H} = -J \mathbf{S}_1 \cdot \mathbf{S}_2$  ( $S_1 = S_2 = 1/2$ ). The best-fitting parameter was  $J = -2.2 \text{ cm}^{-1}$ . The temperature independent paramagnetism was fixed to  $0.0007 \text{ cm}^3 \text{ mol}^{-1}$ .

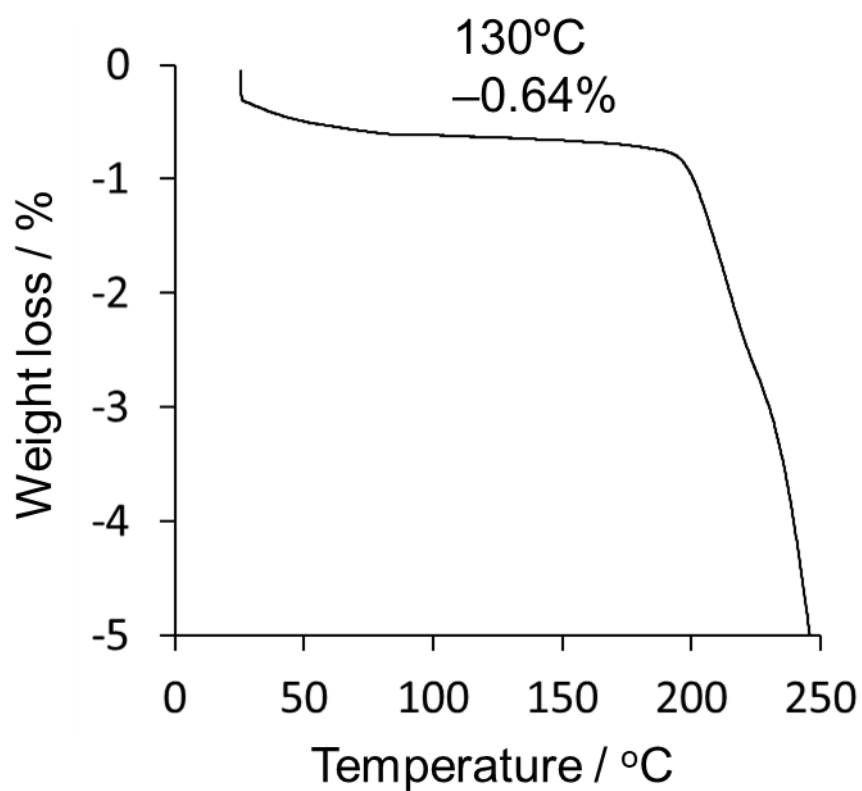

**Figure S4.** Thermogravimetric data of Cu<sub>2</sub>V16. The weight loss is -0.64% at 130°C due to 1 molecule of water. The weight loss over 200°C is due to the decomposition of tetra-*n*-butyl ammonium.

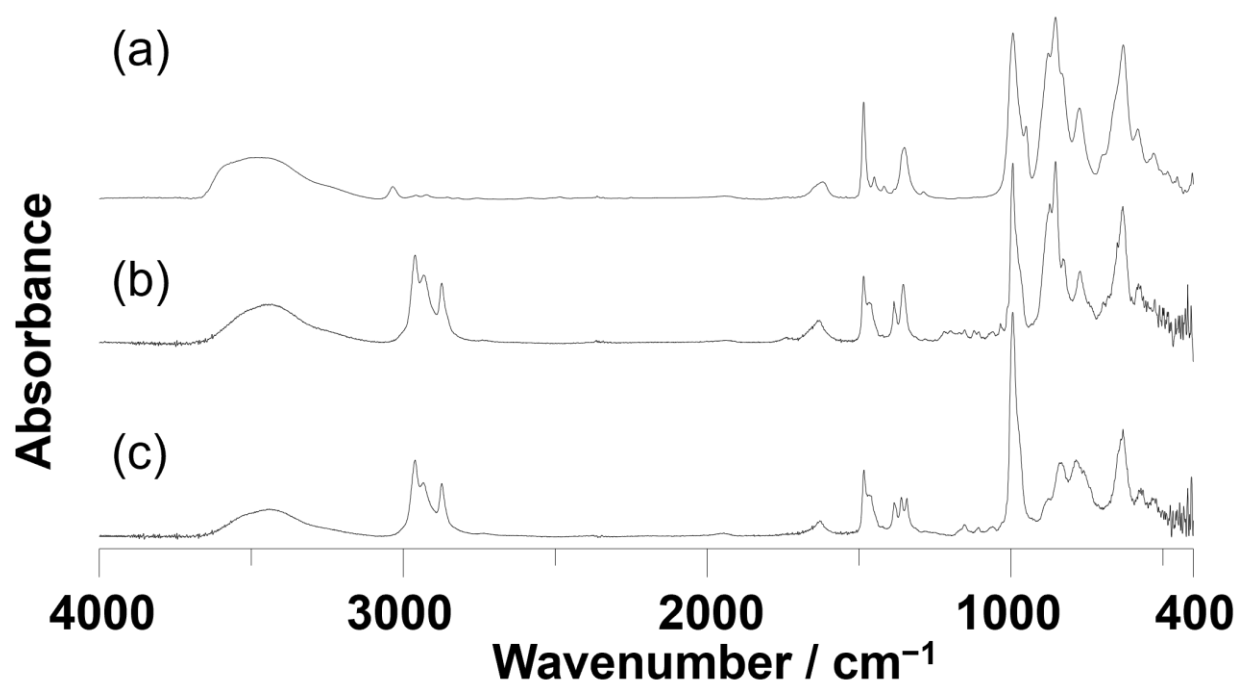

**Figure S5.** IR spectra of (a) tetramethyl ammonium salts of Cu<sub>2</sub>V16, (b) tetra-*n*-butyl ammonium salts of Cu<sub>2</sub>V16, and (c) V18.

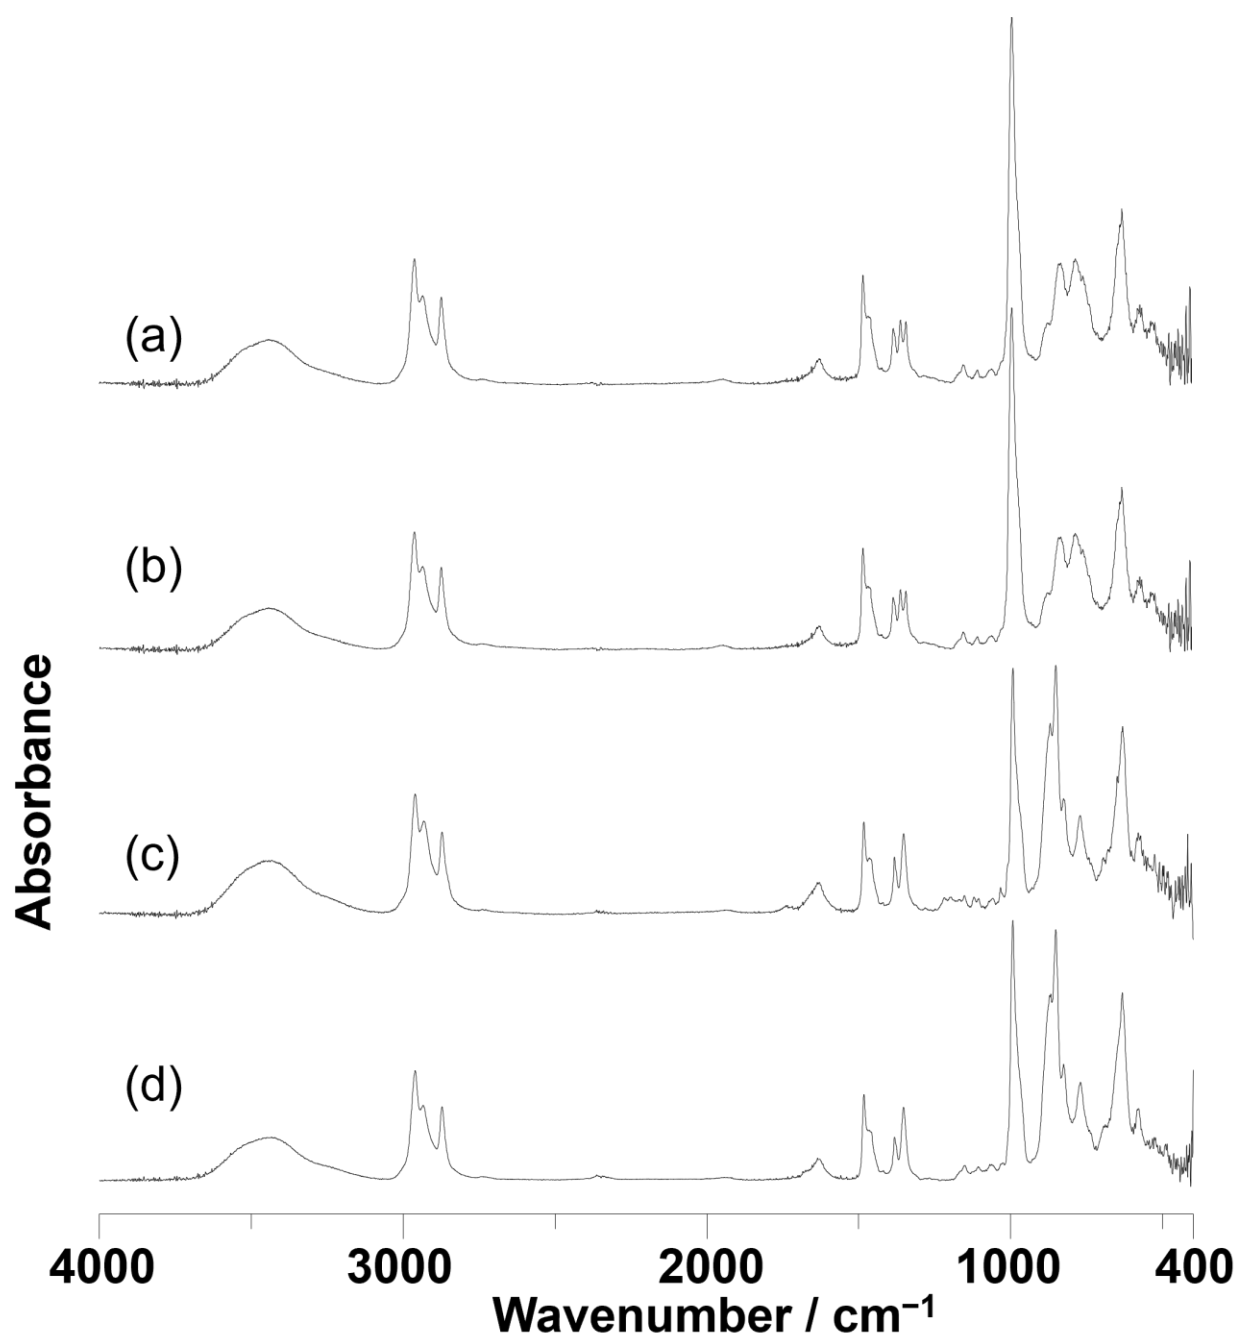

**Figure S6.** IR spectra of (a) V18 before the catalytic reaction, (b) V18 after the catalytic reaction, (c) Cu<sub>2</sub>V16 before the catalytic reaction, and (d) Cu<sub>2</sub>V16 after the catalytic reaction.
